1           **The microbiome and metabolome of pre-term infant stool is**  
2           **personalized, and not driven by health outcomes including**  
3           **necrotizing enterocolitis and late-onset sepsis**

4   Stephen Wandro<sup>1</sup>, Stephanie Osborne<sup>2</sup>, Claudia Enriquez<sup>2</sup>, Christine Bixby<sup>2</sup>, Antonio Arrieta<sup>2</sup>,

5   Katrine Whiteson<sup>1\*</sup>

6   <sup>1</sup>Department of Molecular Biology and Biochemistry, University of California Irvine, Irvine,  
7   California, USA

8   <sup>2</sup>Children's Hospital of Orange County, Orange, California, USA

9   Correspondence\*:

10   Corresponding Author

11   [katrine@uci.edu](mailto:katrine@uci.edu)

12

13   **Keywords: Preterm infant, human microbiome, metabolomics, gas chromatography, 16S sequencing**

## 14 **Abstract**

15 The assembly and development of the gut microbiome in infants has important consequences for  
16 immediate and long-term health. Preterm infants represent an abnormal case for bacterial  
17 colonization because of early exposure to bacteria and frequent use of antibiotics. To better  
18 understand the assembly of the gut microbiota in preterm infants, fecal samples were collected  
19 from 32 very low birthweight preterm infants over the first six weeks of life. Infant health  
20 outcomes included healthy, late-onset sepsis, and necrotizing enterocolitis (NEC). We  
21 characterized the bacterial composition by 16S rRNA gene sequencing and metabolome by  
22 untargeted gas chromatography mass spectrometry. Preterm infant fecal samples lacked  
23 beneficial *Bifidobacterium* and were dominated by *Enterobacteriaceae*, *Enterococcus*, and  
24 *Staphylococcus* due to the near uniform antibiotic administration. Most of the variance between  
25 the microbial community compositions could be attributed to which baby the sample came from  
26 (Permanova  $R^2=0.48$ ,  $p<0.001$ ), while clinical status (healthy, NEC, or late-onset sepsis), and  
27 overlapping time in the NICU did not explain a significant amount of variation in bacterial  
28 composition. Fecal metabolomes were also found to be unique to the individual (Permanova  
29  $R^2=0.43$ ,  $p<0.001$ ) and weakly associated with bacterial composition (Mantel statistic  $r = 0.23 \pm$   
30  $0.05$  ( $p = 0.03 \pm 0.03$ ). No measured metabolites were found to be associated with necrotizing  
31 enterocolitis, late-onset sepsis or a healthy outcome. Overall, preterm infants gut microbial  
32 communities were personalized and reflected antibiotic usage.

## 33 **Importance**

34 Preterm infants face health problems likely related to microbial exposures including sepsis and  
35 necrotizing enterocolitis. However, the role of the gut microbiome in preterm infant health is  
36 poorly understood. Microbial colonization differs from healthy term babies because it occurs in

37 the NICU and is often perturbed by antibiotics. We measured bacterial compositions and  
38 metabolomic profiles of 77 fecal samples from thirty-two preterm infants to investigate the  
39 differences between microbiomes in health and disease. Rather than finding microbial signatures  
40 of disease, we found the preterm infant microbiome and metabolome were both personalized,  
41 and that the preterm infant gut microbiome is enriched in microbes that commonly dominate in  
42 the presence of antibiotics. These results contribute to the growing knowledge of the preterm  
43 infant microbiome and emphasize that a personalized view will be important to disentangling the  
44 health consequences of the preterm infant microbiome.

## 45 **Introduction**

46 Early life exposure to microbes and their metabolic products is a normal part of development,  
47 with enormous and under-explored impact on the immune system. The intestinal microbiota of  
48 infants initially assembles by exposure to the mother's microbiota and microbes in the  
49 environment (1–4). In healthy breast-fed infants *Bifidobacteria longum* spp. *infantis* capable of  
50 digesting human-milk oligosaccharides dominate the infant gut (5). When infants are born  
51 preterm, they are exposed to environmental and human associated microbes earlier in their  
52 development than normal, and rarely harbor *Bifidobacteria* spp. in their gut communities. We do  
53 not yet understand the effects of altering the timing of initial bacterial exposure. With numerous  
54 emerging health consequences related to the microbiome, understanding factors that influence  
55 this initial assembly of the microbiome will be important.

56 Preterm infants are routinely treated with antibiotics, enriching for microbes that can colonize in  
57 the presence of antibiotics (4, 6, 7). While antibiotics have tremendously reduced infant  
58 mortality, their effect on microbiota assembly and resulting health consequences is not fully  
59 understood. Prenatal and postnatal antibiotics have been shown to reduce the diversity of the

60 infant intestinal microbiota (8, 9). Children under two years old are prescribed antibiotics at a  
61 higher rate than any other age group, and 85% of extremely low birthweight infants (< 1000 g)  
62 are given at least one course of antibiotics (10). Even if an infant is not exposed to antibiotics  
63 after birth, approximately 37% of pregnant women use antibiotics over the course of the  
64 pregnancy (11).

65 Perturbing the microbiota of infants can have immediate and long-lasting health consequences.  
66 In the short term, infants can be infected by pathogenic bacteria that results in sepsis, which is  
67 categorized as early-onset or late-onset depending on the timing after birth. Preterm infants are  
68 also at high risk to develop necrotizing enterocolitis (NEC), which is a devastating disease that  
69 causes portions of the bowel to undergo necrosis. NEC is one of the leading causes of mortality  
70 in preterm infants, who make up 90% of NEC cases (12). The incidence of NEC among low  
71 birthweight preterm infants is approximately 7% and causes death in about one third of cases.  
72 The exact causes of NEC are not known, but an excessive inflammatory response to intestinal  
73 bacteria may be involved (13).

74 Many of the long-term consequences of microbial colonization are believed to be mediated by  
75 interactions between the intestinal microbiota and the immune system. In addition to direct  
76 interactions, the microbiota interacts with the immune system through the production of  
77 metabolites that can be taken up directly by immune and epithelial cells (14, 15). For example,  
78 bacterial production of short chain fatty acids can affect health and integrity of the intestinal  
79 epithelia and immune cells (16–18). However, few studies use metabolites alongside bacterial  
80 community profiling. In fact, the healthy composition of an infant fecal metabolome is  
81 understudied.

82 In this retrospective study, we follow the changes in the gut microbiota over time in 32 very low  
83 birth weight (< 1500 grams) preterm infants born at Children’s Hospital Orange County. We  
84 simultaneously track the bacterial composition and metabolite profile over time. Infants were  
85 classified into three groups based on health outcomes: healthy infants, late-onset sepsis, and  
86 NEC. The composition of the intestinal microbiota was measured by 16S rRNA gene sequencing  
87 of fecal samples taken over time. Preterm infant guts were dominated by *Enterobacteriaceae*  
88 and *Enterococcus*, and *Staphylococcus*. Untargeted metabolomics analysis of the fecal samples  
89 by gas chromatography mass spectrometry (GC-MS) revealed a personalized metabolome that  
90 was weakly associated with the bacterial composition.

## 91 **Results**

### 92 Patient cohort

93 A total of 77 fecal samples were collected from 32 very low birth weight infants in the NICU at  
94 Children’s Hospital Orange County from 2011 to 2014 (**Table 1, Figure 1**). Birthweights ranged  
95 from 620 – 1570 grams. Fecal samples were collected between day 7 and 75 of life. Sampling  
96 time and number of fecal samples varied. Three or more longitudinal samples were available  
97 from ten of the infants, while one or two samples were available from the remaining 22 infants.  
98 Three infants developed NEC, eight developed late-onset sepsis, and 21 remained healthy.  
99 Twelve infants were delivered vaginally while the remaining 22 were delivered by cesarean  
100 section. All infants were fed by either breastmilk or a combination of breastmilk and formula.  
101 Twenty-four infants received antibiotics at some point during the sampling period, the most  
102 common being ampicillin and gentamycin.

### 103 Microbial Community Characterization

104 We sequenced the 16S rRNA gene content of each fecal sample to determine bacterial  
105 composition. The total bacterial load of each fecal sample was measured by qPCR of the 16S  
106 rRNA gene and scaled to the total weight of stool that DNA was extracted from. Among all  
107 infants, bacterial abundances vary over four orders of magnitude and were not associated with  
108 health outcome (**Supplemental figure 1**). The high variation in bacterial load is likely due to the  
109 near uniform use of antibiotics. Bacterial communities were composed of mostly  
110 *Enterobacteriaceae*, *Enterococcus*, *Staphylococcus*, and *Bacteroides* (**Figure 2a**). Most samples  
111 were dominated by one to three genera of bacteria. Only three infants (two fed breastmilk, one  
112 fed breastmilk and formula) were colonized at greater than 1 % relative abundance by  
113 *Bifidobacteria*, which emerging evidence suggests is a key member of the infant microbiome.  
114 We computationally confirmed that the primers used are able to detect 90% of known  
115 *Bifidobacteria* species (19). No single bacterial OTU or community composition was  
116 consistently found for infants that became sick (NEC or late-onset sepsis) compared to the  
117 infants that remained healthy.

118 Longitudinal sampling revealed that over the course of days, the bacterial composition could  
119 change dramatically (**Figure 2a, 2b**). Permutational Multivariate Analysis of Variance  
120 (PERMANOVA) was applied to determine which of the known clinical factors explained the  
121 most variance in the bacterial community composition. The individual explained 48% ( $p <$   
122  $0.001$ ) of the variance in the samples, meaning that about half of the total variance among all  
123 tested fecal samples could be attributed to the infant the fecal sample came from (**Supplemental**  
124 **table 1**). None of the other factors explained a significant amount of variation in the bacterial  
125 composition, including infant health, overlapping dates in the NICU, delivery mode, or feeding

126 mode. Four of the infants in the study are twins. Twin set 1 (infants 12 and 13) had a similar  
127 microbial composition while the other three sets did not (**Supplemental Figure 2**).

128 Diversity of the bacterial communities was low as expected for preterm infants. Alpha diversity  
129 as measured by Shannon index increased overall with age, but the trend was not significant  
130 (linear model  $R^2 = 0.005$ ,  $p = 0.52$ ) (**Figure 3a**). Other clinical factors including health outcome,  
131 feeding (breastmilk versus breastmilk and formula), antibiotic use, and delivery mode were  
132 tested for an effect on the alpha diversity (**Figure 3b-e**). None of the factors were associated with  
133 a difference in alpha diversity except recorded antibiotic use, in which Shannon diversity was  
134 unexpectedly lower on average in infants that did not have a record of receiving antibiotics  
135 (Wilcoxon rank sum test  $p=0.06$ ). It should be noted that although six infants did not have a  
136 record of antibiotic use, records may be incomplete due to hospital transfers. All four infants that  
137 were colonized with *Bacteroides* were born vaginally, although five other vaginally born infants  
138 were not colonized. Only vaginally born infants were colonized by *Bacteroides* (four out of nine  
139 infants) while none of the twenty-two infants born by C-section were colonized.

#### 140 Metabolomics

141 Metabolite profiles of infant fecal samples were analyzed by gas chromatography mass  
142 spectrometry, which measures small primary metabolites. Over 400 small molecules were  
143 detected from each fecal sample and 224 metabolites were known compounds. Metabolites were  
144 grouped into the following categories: amino acid metabolism, bile acids, central metabolism,  
145 fatty acids, fermentation products, lipid metabolism, nucleotide metabolism, organic acids,  
146 sterols, sugars, sugar acids, sugar alcohols, and vitamin metabolism (**Figure 4, Supplemental**  
147 **table 2**). No metabolites or categories of metabolites were found to be associated with  
148 necrotizing enterocolitis or late-onset sepsis. The metabolite profile of each infant was seen to

149 vary over time, similar to the amount of variation seen in the bacterial composition (**Figure 5**).  
150 PERMANOVA analysis to determine which factors explain the most variance in the metabolite  
151 profile indicate that the individual explains 43% ( $p < 0.001$ ) of the variation (**Supplemental**  
152 **table 1**).

153 To determine which metabolites might be useful for tracking bacterial metabolism in the infant  
154 gut, we examined metabolites with consistent abundance among infants versus those that varied  
155 (**Supplemental figure 3**). In general, sugars, central metabolites, and amino acids were variable  
156 while fatty acids, sterols, organic acids, and bile acids were more consistent. Infant 23, which  
157 developed necrotizing enterocolitis at day 16 of life, had low abundances of amino acid  
158 metabolites the two days prior to disease onset (**Figure 4**). However, several of the healthy  
159 control infants also had similarly low abundances of amino acid metabolites. The individual  
160 signal of each infant's metabolome is far more evident than any trends due to clinical factors  
161 (**Supplemental table 1**).

#### 162 Bacterial composition associated with metabolite profile

163 Bacterial metabolism in the gut is expected to contribute to the abundances of metabolites  
164 detected in fecal samples. We wanted to know if fecal samples with a similar bacterial  
165 composition were also similar in their metabolite profile. We employed a Mantel test using  
166 Pearson correlations between distances among bacterial compositions of samples and distances  
167 among metabolite profiles of samples. Because bacterial compositions and metabolite profiles  
168 are personalized, using multiple samples from a single infant would skew the result. Therefore,  
169 one sample from each infant was randomly selected 100 times to remove the effect of the  
170 individual and the Mantel test was applied to each subset. The average Mantel statistic of  $r =$   
171  $0.23 \pm 0.05$  ( $p = 0.03 \pm 0.03$ ) indicates a weak but significant association between the bacterial



172 composition and metabolite profile. Also, within individual infants, shifts in the bacterial  
173 composition are accompanied by shifts in the metabolome. Infants 17, 23, and 31 have dramatic  
174 shifts in both bacterial composition and metabolome profile over time, while infants 10 and 37  
175 remain stable in both bacterial composition and metabolome.

176 To investigate the correlations driving this overall association, we calculated correlations  
177 between bacterial abundances and metabolite intensities (**Figure 6**). *Staphylococcus* had the most  
178 positive correlations including several classes of sugar metabolites, organic acids, and central  
179 metabolites. Fatty acids, lipid metabolism, and amino acids were positively correlated with the  
180 commonly abundant gut colonizers *Enterobacteriaceae* and *Bacteroides*, and negatively  
181 correlated with the commonly low abundance colonizers *Staphylococcus* and *Enterococcus*. We  
182 also looked more specifically at individual metabolites correlated with bacterial abundances  
183 (**Figure 6**). Bacteroidetes were found to be positively correlated with succinate ( $r = 0.85$ ). Many  
184 other weak correlations ( $r < 0.5$ ) exist between bacterial abundances and metabolite intensities,  
185 but the sample size is not large enough to distinguish signal from noise.

## 186 **Discussion**

187 Bacterial compositions in this cohort were consistent with the emerging picture from other  
188 studies that show the preterm infant gut harbors communities dominated by facultative anaerobes  
189 including *Enterobacteriaceae*, *Enterococcus*, and *Staphylococcus* (1, 2, 20). These communities  
190 appear to be enriched in commonly antibiotic resistant organisms (21). While we expected to  
191 find associations between bacterial community composition and health outcome in this cohort,  
192 we were surprised to find that there were not clear signatures of microbiome composition linked  
193 to NEC or sepsis. In larger cohorts, associations between particular bacteria or metabolites with  
194 NEC have been reported, however, they are not universal signatures across patients, and may

195 reflect patient variation more than disease etiology (22–25). In fact, the strongest signal in both  
196 the microbiome and metabolome data from this cohort was the infant from whom the sample was  
197 taken. Overall, preterm infant microbiomes in this study were shaped by antibiotics, which have  
198 a strong impact on all patients, regardless of health outcome.

199 Although the bacterial composition of infant guts varied over time, we saw longitudinal samples  
200 from individual infants remained highly personalized over several weeks; nearly half of the  
201 variation in the microbial community compositions can be explained by which individual the  
202 sample came from. The stability of animal-associated microbiomes is an active area of research,  
203 with studies finding that the individual microbiome of an adult remains stable through time (26),  
204 but can be perturbed by extreme changes in diet or antibiotics (27–29). The bacterial  
205 composition in the adult gut largely returns to its previous state one month after antibiotic  
206 treatment, but altering the initial assembly of the microbiota in infants can have long lasting  
207 health consequences (7, 27, 30, 31). Previous work has found ampicillin and gentamycin (the  
208 most common antibiotics taken by infants in this study) to have an inconsistent effect on  
209 bacterial diversity, sometimes increasing and sometimes decreasing diversity (1). Similarly, in  
210 these infants, ampicillin and gentamycin resulted in more variation in bacterial diversity, but  
211 there was no clear trend of increasing or decreasing diversity. However, antibiotics change the  
212 dominant members of the microbiota which could have profound effects on immune  
213 development and growth (7, 31–33).

214 Evidence is emerging that a healthy infant gut microbiota is dominated by *Bifidobacteria* with  
215 the capacity to digest human milk oligosaccharides in breastmilk (5, 34, 35). The lack of a core  
216 *Bifidobacteria* community in infants could leave the microbiota open to colonization by  
217 facultative anaerobes like we observed in these infants (36). Proteobacteria such as

218 *Enterobacteriaceae* are commonly seen to increase in abundance after antibiotic administration  
219 (21). Indeed, infants in this study had microbiomes that were shaped by antibiotic use. Although  
220 six of the thirty-two infants in this study did not have recorded antibiotic use around sampling  
221 time, the microbiota can still be affected by prenatal antibiotics taken by the mother (7, 31, 37).

222 Microbiome studies have become widespread, so that a typical bacterial composition is well  
223 characterized in a range of sample cohorts. However, the same cannot be said for the  
224 metabolome. There is a dearth of knowledge about what a consensus healthy infant fecal  
225 metabolome should be, making comparisons for the cohort in this study difficult. To add to the  
226 complexity, each metabolomic approach detects subsets of metabolites, and depends on sample  
227 extraction and other method choices. Increasing the frequency of metabolomics data collection in  
228 microbiome studies would be a huge step forward for the field. Baseline knowledge about the  
229 typical connections between metabolite abundances and bacterial metabolism should be  
230 collected, so that molecules that have consistent abundances in a healthy state could give context  
231 to data generated from clinical samples in different disease states.

232 Untargeted metabolomics can survey many metabolites in a biological sample to provide a  
233 snapshot of the active metabolism in a system such as the human gut. Metabolite profiles of  
234 preterm infants in this study were found to be personalized to a similar degree as the bacterial  
235 composition. This is in contrast to a previous study on full term infants that showed the  
236 metabolomic profile to be stable, and weakly associated with bacterial composition, over the first  
237 few years of life (38). Personalized metabolic signatures of disease hold great promise to  
238 complement microbiota profiling in human systems (18, 36). However, analyzing metabolomic  
239 data is challenging because an array of inputs contribute to the abundances of metabolites in  
240 fecal samples including bacterial metabolism, host biology, and food intake.

241 We report a number of correlations between bacteria and metabolites in preterm infant feces, and  
242 bacterial metabolism has been previously shown to contribute to metabolite abundances in  
243 humans and mice (15, 39, 40). Short chain fatty acids are now commonly measured and  
244 associated with bacterial fermentation in the gut (41). In this study, the only short-chain fatty  
245 acid detected was succinate, which we found to be correlated with the presence of *Bacteroides*,  
246 which produces acetate and succinate from carbohydrate fermentation (42). We also detected  
247 several medium-chain fatty acids, which were generally correlated with the abundance of  
248 *Bacteroides* and *Enterobacteriaceae*. None of the twenty-two C-section born infants in this study  
249 were colonized by *Bacteroides*, possibly due to a lack of vertical transmission from the mother  
250 during birth (3).

251 Overall, we find preterm infant microbiomes are shaped by shared exposures especially to  
252 antibiotics, leading to the dominance of antibiotic resistant facultative anaerobes such as  
253 *Enterococcus* spp.. The anaerobic, milk degrading *Bifidobacteria* were largely absent, even in  
254 preterm infants with access to breastmilk, possibly due to a lack of exposure to microbes from  
255 family members in the sterile hospital environment along with antibiotics. Our understanding of  
256 the health consequences of microbial colonization under these antibiotic-enriched circumstances  
257 is still in its infancy.

## 258 **Materials and methods**

### 259 Sample Collection

260 Stool samples from diapers of preterm infants in the neonatal intensive care unit at Children's  
261 Hospital Orange County were collected by nurses over three years from 2011 to 2014. Samples  
262 were immediately stored at -20 °C then transferred to -80 °C no more than three days post-  
263 collection. Samples were kept at -80 °C and thawed once for DNA extraction and metabolomics.  
264 A total of 77 stool samples were collected from 32 preterm infants.

### 265 DNA extraction and 16S rRNA gene sequencing

266 Stool samples were thawed once and DNA was extracted from 10 mg using a fecal Zymo Fecal  
267 DNA MiniPrep Kit (#D6010). The V3 and V4 region of the 16SrRNA gene was amplified with  
268 two-stage PCR. The first PCR amplified the V3 to V4 region of the 16S rRNA gene using 341F  
269 and 805R primers: forward primer (5'- CCTACGGGNGGCWGCAG-3') and reverse primer (5'-  
270 GACTACHVGGGTATCTAATCC -3') (43). These primers also added an overhang so that  
271 barcodes and Illumina adaptors could be added in the second PCR. The first PCR was done as  
272 follows: 30 cycles of 95 °C 30 seconds; 65 °C 40 seconds; 72 °C 1 minute. Immediately after  
273 completion of the first PCR, primers with sample specific barcodes and Illumina adapter  
274 sequences were added and a second PCR was performed as follows: 9 cycles 94 °C for 30  
275 seconds; 55 °C 40 seconds; 72 °C 1 minute. PCR reactions were cleaned using Agencourt  
276 AMPure XP magnetic beads (#A63880) using the recommended protocol. Amplicons were run  
277 on an agarose gel to confirm amplification and then pooled. Amplicon pool was run on an  
278 agarose gel and the 500bp fragment was cut out and gel extracted using Millipore Gel Extraction  
279 Kit (#LSKGEL050). The sequencing library was quantified using Quant-iT Pico Green dsDNA

280 Reagent and sent to Laragen Inc. for sequencing on the Illumina MiSeq platform with 250bp  
281 paired-end reads producing a total of 2.4 million paired-end reads.

### 282 qPCR for bacterial load

283 The bacterial load of each fecal sample was measured with quantitative PCR of a conserved  
284 region of the 16S gene. The following primers were used: (5'- TCC TAC GGG AGG CAG CAG  
285 T-3'), (5'- GGA CTA CCA GGG TAT CTA ATC CTG TT-3'). PerfeCTa SYBER Green  
286 SuperMix Reaction Mix (Quantabio #95054) was used to quantify DNA from samples. Relative  
287 abundance of 16S rRNA genes relative to the mass of stool was compared for each sample. Total  
288 fecal DNA was measured with Quant-iT Pico Green dsDNA Assay Kit (ThermoFisher  
289 #P11496).

### 290 Sequence processing

291 Sequences were quality filtered using PrinSeq to remove adapters as well as any sequences less  
292 than 120 base-pairs, containing any ambiguous bases, or with a mean PHRED quality score of  
293 less than 30 (44). Reads were found to drop steeply in quality after 140 base pairs, so all reads  
294 were trimmed to 140 base pairs. The forward read contained the V3 region in the high quality  
295 first 140 base pairs, while the V4 region was captured in the low-quality region of the reverse  
296 reads. Therefore, we used only the forward reads for subsequent analyses.

### 297 Bacterial community analysis

298 Quantitative Insights Into microbial Ecology (QIIME) was used for de novo OTUs picking using  
299 the Swarm algorithm with a clustering threshold of 8 (45, 46). This resulted in 2,810 OTUs  
300 among all samples. OTUs containing only one sequence were filtered out, leaving 212 OTUs.  
301 Taxonomy was assigned to each OTU using QIIME and the Greengenes 13\_8 database. An OTU

302 table was constructed and used for downstream analysis. Ten rarefactions were performed on the  
303 OTU table down to 2000 reads per sample, which was the largest number of reads that allowed  
304 retention of most samples. QIIME was used to calculate alpha diversity by Shannon index and  
305 beta diversity by the average weighted UniFrac distance of the ten rarefactions. Community  
306 composition barplots, Principal Coordinate Analysis (PCoA) plots, and alpha diversity plots  
307 were created using R and the ggplot2 package (47, 48). All R scripts are included in the  
308 supplemental information.

### 309 Untargeted metabolomics by GC-MS

310 When fecal samples were thawed for DNA extraction, approximately 50 mg was collected and  
311 refrozen at -80 ° for metabolomics. Samples were sent on dry ice to the West Coast  
312 Metabolomics Center (WCMC) at UC Davis for untargeted metabolomics by gas  
313 chromatography time-of-flight mass spectrometry. Metabolites were extracted from fecal  
314 samples with a 3:3:2 mixture of isopropanol, acetonitrile, and water respectively before  
315 derivatization and GC-MS analysis by Fiehn Lab standard operating procedures (49–51).  
316 Metabolite profiles were compared by calculating Manhattan distances between samples based  
317 on all metabolite intensities and visualized by PCoA using the vegan and ape packages in R (52,  
318 53).

### 319 Permutational multivariate analysis of variance (PERMANOVA)

320 PERMANOVA was used to determine factors that explained variance in bacterial community  
321 composition and metabolite profile. PERMANOVA was performed using the adonis function in  
322 the vegan package in R. The input for PERMANOVA was UniFrac distances of the 16S data and  
323 Manhattan distances of the metabolite profiles. Briefly, PERMANOVA quantifies the variation

324 among samples explained by the given groupings compared to randomized groupings. To  
325 measure the variance explained by individual infant, we excluded samples that had fewer than  
326 three longitudinal samples, leaving ten infants. When performing PERMANOVA for factors  
327 other than individual, we accounted for the longitudinal sampling by repeatedly subsampling one  
328 sample from each infant and averaging the results.

### 329 Correlations between bacteria and metabolites

330 Pearson correlations between bacterial abundances and normalized metabolite intensities were  
331 calculated using the cor function in R. Correlations were calculated between the relative  
332 abundances of all bacterial classes and all metabolite intensities among all samples in all infants.  
333 Only the four most highly abundant general of bacteria were used to ensure no results were  
334 skewed by taxa present in only one or a few samples. For each class of metabolite, the average of  
335 all correlations between metabolites in that class and each taxon was calculated so that trends  
336 between bacterial taxa and classes of metabolites could be visualized by heatmap.

### 337 Mantel test

338 To determine if fecal samples with similar bacterial compositions also have similar metabolite  
339 profiles, a Mantel test was performed. To account for the effect of longitudinal sampling, each  
340 dataset was randomly subsampled down to one sample per infant. A Bray-Curtis dissimilarity  
341 matrix was computed for the bacterial composition and Manhattan distances calculated for  
342 metabolite intensities. The Mantel function in the vegan package of R was used to calculate the  
343 Mantel statistic for a Pearson correlation between the two dissimilarity matrices. The average  
344 and standard deviation of the Mantel statistic  $r$  and  $p$ -value for the 100 Mantel tests was reported.

### 345 **Data availability**



346 Raw sequence data will be uploaded to the SRA. OTU tables, raw metabolomics data, a  
347 markdown file of sequence processing workflow, and R scripts used for analyses are available at  
348 [https://github.com/swandro/preterm\\_infant\\_analysis](https://github.com/swandro/preterm_infant_analysis).

### 349 **Acknowledgements**

350 This project was supported by a UCI Single Investigator grant, the CORCCL SIIG-2014-2015-  
351 51, a pilot grant from the UC Davis West Coast Metabolomics Core as part of NIH-DK097154,  
352 and start-up funds for the Whiteson Lab in UC Irvine's Molecular Biology and Biochemistry  
353 Department. Thanks to CORCL for funding.

354 Thank you to Ying (Lucy) Lu for help with qPCR experiments. Thank you Celine Mougnot and  
355 Adam Martiny for providing 16S primers and protocols. Thanks to Ilhem Messaoudi and  
356 members of the Whiteson lab for editing. Thanks to Megan Showalter and Prof. Oliver Fiehn of  
357 the UC Davis West Coast Metabolomics Core were very helpful in carrying out untargeted GC-  
358 MS profiling.

## 359 References

- 360 1. Gibson MK, Wang B, Ahmadi S, Burnham C-AD, Tarr PI, Warner BB, Dantas G. 2016.  
361 Developmental dynamics of the preterm infant gut microbiota and antibiotic resistome.  
362 Nat Microbiol 1:16024.
- 363 2. Rosa PS La, Warner BB, Zhou Y, Weinstock GM, Sodergren E, Hall-Moore CM, Stevens  
364 HJ, Bennett WE, Shaikh N, Linneman LA, Hoffmann JA, Hamvas A, Deych E, Shands  
365 BA, Shannon WD, Tarr PI. 2014. Patterned progression of bacterial populations in the  
366 premature infant gut. Proc Natl Acad Sci 111:12522–12527.
- 367 3. Bäckhed F, Roswall J, Peng Y, Feng Q, Jia H, Kovatcheva-Datchary P, Li Y, Xia Y, Xie  
368 H, Zhong H, Khan MT, Zhang J, Li J, Xiao L, Al-Aama J, Zhang D, Lee YS, Kotowska  
369 D, Colding C, Tremaroli V, Yin Y, Bergman S, Xu X, Madsen L, Kristiansen K, Dahlgren  
370 J, Wang J. 2015. Dynamics and Stabilization of the Human Gut Microbiome during the  
371 First Year of Life. Cell Host Microbe 17:690–703.
- 372 4. Bokulich NA, Chung J, Battaglia T, Henderson N, Jay M, Li H, D Lieber A, Wu F, Perez-  
373 Perez GI, Chen Y, Schweizer W, Zheng X, Contreras M, Dominguez-Bello MG, Blaser  
374 MJ. 2016. Antibiotics, birth mode, and diet shape microbiome maturation during early  
375 life. Sci Transl Med 8:343ra82.
- 376 5. Frese SA, Hutton AA, Contreras LN, Shaw CA, Palumbo MC, Casaburi G, Xu G, Davis  
377 JCC, Lebrilla CB, Henrick BM, Freeman SL, Barile D, German JB, Mills DA, Smilowitz  
378 JT, Underwood MA. 2017. Persistence of Supplemented *Bifidobacterium longum* subsp.  
379 *infantis* EVC001 in Breastfed Infants. mSphere 2:e00501-17.
- 380 6. Nobel YR, Cox LM, Kirigin FF, Bokulich NA, Yamanishi S, Teitler I, Chung J, Sohn J,  
381 Barber CM, Goldfarb DS, Raju K, Abubucker S, Zhou Y, Ruiz VE, Li H, Mitreva M,  
382 Alekseyenko A V, Weinstock GM, Sodergren E, Blaser MJ. 2015. Metabolic and  
383 metagenomic outcomes from early-life pulsed antibiotic treatment. Nat Commun 6:7486.
- 384 7. Cox LM, Yamanishi S, Sohn J, Alekseyenko A V, Leung JM, Cho I, Kim SG, Li H, Gao  
385 Z, Mahana D, Zárata Rodriguez JG, Rogers AB, Robine N, Loke P, Blaser MJ. 2014.  
386 Altering the Intestinal Microbiota during a Critical Developmental Window Has Lasting  
387 Metabolic Consequences. Cell 158:705–721.
- 388 8. Tanaka S, Kobayashi T, Songjinda P, Tateyama A, Tsubouchi M, Kiyohara C, Shirakawa  
389 T, Sonomoto K, Nakayama J. 2009. Influence of antibiotic exposure in the early postnatal  
390 period on the development of intestinal microbiota. FEMS Immunol Med Microbiol  
391 56:80–87.
- 392 9. Keski-Nisula L, Kyynäräinen H-R, Kärkkäinen U, Karhukorpi J, Heinonen S, Pekkanen J.  
393 2013. Maternal intrapartum antibiotics and decreased vertical transmission of  
394 *Lactobacillus* to neonates during birth. Acta Paediatr (Oslo, Norw 1992) 102:480–485.
- 395 10. Ting JY, Synnes A, Roberts A, Deshpandey A, Dow K, Yoon EW, Lee K-S, Dobson S,  
396 Lee SK, Shah PS. 2016. Association Between Antibiotic Use and Neonatal Mortality and  
397 Morbidities in Very Low-Birth-Weight Infants Without Culture-Proven Sepsis or  
398 Necrotizing Enterocolitis. JAMA Pediatr 170:1181–1187.

- 399 11. Stokholm J, Schjørring S, Pedersen L, Bischoff AL, Følsgaard N, Carson CG, Chawes  
400 BLK, Bønnelykke K, Mølgaard A, Krogfelt KA, Bisgaard H. 2013. Prevalence and  
401 predictors of antibiotic administration during pregnancy and birth. *PLoS One* 8:e82932.
- 402 12. Fitzgibbons SC, Ching Y, Yu D, Carpenter J, Kenny M, Weldon C, Lillehei C, Valim C,  
403 Horbar JD, Jaksic T. 2009. Mortality of necrotizing enterocolitis expressed by birth  
404 weight categories. *J Pediatr Surg* 44:1072–1076.
- 405 13. Nanthakumar N, Meng D, Goldstein AM, Zhu W, Lu L, Uauy R, Llanos A, Claud EC,  
406 Walker WA. 2011. The Mechanism of Excessive Intestinal Inflammation in Necrotizing  
407 Enterocolitis: An Immature Innate Immune Response. *PLoS One* 6:e17776.
- 408 14. Dodd D, Spitzer MH, Van Treuren W, Merrill BD, Hryckowian AJ, Higginbottom SK, Le  
409 A, Cowan TM, Nolan GP, Fischbach MA, Sonnenburg JL. 2017. A gut bacterial pathway  
410 metabolizes aromatic amino acids into nine circulating metabolites. *Nature* 551:648.
- 411 15. Wikoff WR, Anfora AT, Liu J, Schultz PG, Lesley SA, Peters EC, Siuzdak G. 2009.  
412 Metabolomics analysis reveals large effects of gut microflora on mammalian blood  
413 metabolites. *Proc Natl Acad Sci U S A* 106:3698–703.
- 414 16. Willemsen LEM, Koetsier MA, van Deventer SJH, van Tol EAF. 2003. Short chain fatty  
415 acids stimulate epithelial mucin 2 expression through differential effects on prostaglandin  
416 E1 and E2 production by intestinal myofibroblasts. *Gut* 52:1442–1447.
- 417 17. Chang P V, Hao L, Offermanns S, Medzhitov R. 2014. The microbial metabolite butyrate  
418 regulates intestinal macrophage function via histone deacetylase inhibition. *Proc Natl*  
419 *Acad Sci* 111:2247–2252.
- 420 18. Kelly CJ, Zheng L, Campbell EL, Saeedi B, Scholz CC, Bayless AJ, Wilson KE, Glover  
421 LE, Kominsky DJ, Magnuson A, Weir TL, Ehrentraut SF, Pickel C, Kuhn KA, Lanis JM,  
422 Nguyen V, Taylor CT, Colgan SP. 2015. Crosstalk between Microbiota-Derived Short-  
423 Chain Fatty Acids and Intestinal Epithelial HIF Augments Tissue Barrier Function. *Cell*  
424 *Host Microbe* 17:662–671.
- 425 19. Cole JR, Wang Q, Fish JA, Chai B, McGarrell DM, Sun Y, Brown CT, Porras-Alfaro A,  
426 Kuske CR, Tiedje JM. 2014. Ribosomal Database Project: data and tools for high  
427 throughput rRNA analysis. *Nucleic Acids Res* 42:D633-42.
- 428 20. Grier A, Qiu X, Bandyopadhyay S, Holden-Wiltse J, Kessler HA, Gill AL, Hamilton B,  
429 Huyck H, Misra S, Mariani TJ, Ryan RM, Scholer L, Scheible KM, Lee Y-H, Caserta  
430 MT, Pryhuber GS, Gill SR. 2017. Impact of prematurity and nutrition on the developing  
431 gut microbiome and preterm infant growth. *Microbiome* 5:158.
- 432 21. Sommer MO, Dantas G. 2011. Antibiotics and the resistant microbiome. *Curr Opin*  
433 *Microbiol* 14:556–563.
- 434 22. Morrow AL, Lagomarcino AJ, Schibler KR, Taft DH, Yu Z, Wang B, Altaye M, Wagner  
435 M, Gevers D, Ward D V, Kennedy MA, Huttenhower C, Newburg DS. 2013. Early  
436 microbial and metabolomic signatures predict later onset of necrotizing enterocolitis in  
437 preterm infants. *Microbiome* 1:13.
- 438 23. Sim K, Shaw AG, Randell P, Cox MJ, McClure ZE, Li M-S, Haddad M, Langford PR,

- 439 Cookson WOCM, Moffatt MF, Kroll JS. 2015. Dysbiosis Anticipating Necrotizing  
440 Enterocolitis in Very Premature Infants. *Clin Infect Dis* 60:389–397.
- 441 24. Heida FH, Zoonen V, F AGJ, Hulscher JBF, Kiefte T, C BJ, Wessels R, Kooi EMW, Bos  
442 AF, Harmsen HJM, Goffau D, C M. A Necrotizing Enterocolitis-Associated Gut  
443 Microbiota Is Present in the Meconium: Results of a Prospective Study 62:863–870.
- 444 25. Cassir N, Benamar S, Khalil JB, Croce O, Saint-Faust M, Jacquot A, Million M, Azza S,  
445 Armstrong N, Henry M, Jardot P, Robert C, Gire C, Lagier J-C, Chabrière E, Ghigo E,  
446 Marchandin H, Sartor C, Boutte P, Cambonie G, Simeoni U, Raoult D, Scola B La.  
447 *Clostridium butyricum* Strains and Dysbiosis Linked to Necrotizing Enterocolitis in  
448 Preterm Neonates 61:1107–1115.
- 449 26. Faith JJ, Guruge JL, Charbonneau M, Subramanian S, Seedorf H, Goodman AL, Clemente  
450 JC, Knight R, Heath AC, Leibel RL, Rosenbaum M, Gordon JI. 2013. The Long-Term  
451 Stability of the Human Gut Microbiota. *Science* (80- ) 341:1237439–1237439.
- 452 27. Dethlefsen L, Relman DA. 2011. Incomplete recovery and individualized responses of the  
453 human distal gut microbiota to repeated antibiotic perturbation. *Proc Natl Acad Sci U S A*  
454 108 Suppl:4554–4561.
- 455 28. David LA, Maurice CF, Carmody RN, Gootenberg DB, Button JE, Wolfe BE, Ling A V.,  
456 Devlin AS, Varma Y, Fischbach MA, Biddinger SB, Dutton RJ, Turnbaugh PJ. 2013. Diet  
457 rapidly and reproducibly alters the human gut microbiome. *Nature* 505:559–563.
- 458 29. Brüssow H. 2016. How stable is the human gut microbiota? And why this question  
459 matters. *Environ Microbiol* 18:2779–2783.
- 460 30. Dethlefsen L, Huse S, Sogin ML, Relman DA. 2008. The Pervasive Effects of an  
461 Antibiotic on the Human Gut Microbiota, as Revealed by Deep 16S rRNA Sequencing.  
462 *PLOS Biol* 6:e280.
- 463 31. Schulfer A, Blaser MJ. 2015. Risks of Antibiotic Exposures Early in Life on the  
464 Developing Microbiome. *PLOS Pathog* 11:e1004903.
- 465 32. Metsälä J, Lundqvist A, Virta LJ, Kaila M, Gissler M, Virtanen SM. 2015. Prenatal and  
466 post-natal exposure to antibiotics and risk of asthma in childhood. *Clin Exp Allergy*  
467 45:137–145.
- 468 33. Mueller NT, Whyatt R, Hoepner L, Oberfield S, Dominguez-Bello MG, Widen EM,  
469 Hassoun A, Perera F, Rundle A. 2015. Prenatal exposure to antibiotics, cesarean section  
470 and risk of childhood obesity. *Int J Obes* 39:665–670.
- 471 34. Karav S, Parc A Le, Bell JMLN de M, Frese SA, Kirmiz N, Block DE, Barile D, Mills  
472 DA. 2016. Oligosaccharides Released from Milk Glycoproteins Are Selective Growth  
473 Substrates for Infant-Associated Bifidobacteria.
- 474 35. Underwood MA, Davis JCC, Kalanetra KM, Gehlot S, Patole S, Tancredi DJ, Mills DA,  
475 Lebrilla CB, Simmer K. 2017. Digestion of Human Milk Oligosaccharides by  
476 *Bifidobacterium Breve* in the Premature Infant. *J Pediatr Gastroenterol Nutr* 1.
- 477 36. Stewart CJ, Embleton ND, Marrs ECL, Smith DP, Nelson A, Abdulkadir B, Skeath T,

- 478 Petrosino JF, Perry JD, Berrington JE, Cummings SP. 2016. Temporal bacterial and  
479 metabolic development of the preterm gut reveals specific signatures in health and  
480 disease. *Microbiome* 4.
- 481 37. Clark RH, Bloom BT, Spitzer AR, Gerstmann DR. 2006. Reported Medication Use in the  
482 Neonatal Intensive Care Unit: Data From a Large National Data Set. *Pediatrics* 117:1979–  
483 1987.
- 484 38. Kostic AD, Gevers D, Siljander H, Vatanen T, Hyötyläinen T, Hämäläinen A-M, Peet A,  
485 Tillmann V, Pöhö P, Mattila I, Lähdesmäki H, Franzosa EA, Vaarala O, de Goffau M,  
486 Harmsen H, Ilonen J, Virtanen SM, Clish CB, Orešič M, Huttenhower C, Knip M,  
487 DIABIMMUNE Study Group RJ, Xavier RJ. 2015. The dynamics of the human infant gut  
488 microbiome in development and in progression toward type 1 diabetes. *Cell Host Microbe*  
489 17:260–73.
- 490 39. Yen S, McDonald JAK, Schroeter K, Oliphant K, Sokolenko S, Blondeel EJM, Allen-  
491 Vercoe E, Aucoin MG. 2015. Metabolomic Analysis of Human Fecal Microbiota: A  
492 Comparison of Feces-Derived Communities and Defined Mixed Communities. *J Proteome*  
493 *Res* 14:1472–1482.
- 494 40. Dodd D, Spitzer MH, Van Treuren W, Merrill BD, Hryckowian AJ, Higginbottom SK, Le  
495 A, Cowan TM, Nolan GP, Fischbach MA, Sonnenburg JL. 2017. A gut bacterial pathway  
496 metabolizes aromatic amino acids into nine circulating metabolites. *Nature* 551:648.
- 497 41. Morrison DJ, Preston T. 2016. Formation of short chain fatty acids by the gut microbiota  
498 and their impact on human metabolism. *Gut Microbes* 7:189–200.
- 499 42. Miller TL. 1978. The pathway of formation of acetate and succinate from pyruvate by  
500 *Bacteroides succinogenes*. *Arch Microbiol* 117:145–52.
- 501 43. Herlemann DP, Labrenz M, Jürgens K, Bertilsson S, Waniek JJ, Andersson AF. 2011.  
502 Transitions in bacterial communities along the 2000 km salinity gradient of the Baltic Sea.  
503 *ISME J* 5:1571–1579.
- 504 44. Schmieder R, Edwards R. 2011. Quality control and preprocessing of metagenomic  
505 datasets. *Bioinformatics* 27:863–864.
- 506 45. Caporaso JG, Kuczynski J, Stombaugh J, Bittinger K, Bushman FD, Costello EK, Fierer  
507 N, Peña AG, Goodrich JK, Gordon JI, Huttley GA, Kelley ST, Knights D, Koenig JE, Ley  
508 RE, Lozupone CA, McDonald D, Muegge BD, Pirrung M, Reeder J, Sevinsky JR,  
509 Turnbaugh PJ, Walters WA, Widmann J, Yatsunenkov T, Zaneveld J, Knight R. 2010.  
510 QIIME allows analysis of high-throughput community sequencing data. *Nat Methods*  
511 7:335–336.
- 512 46. Mahé F, Rognes T, Quince C, de Vargas C, Dunthorn M. 2014. Swarm: robust and fast  
513 clustering method for amplicon-based studies. *PeerJ* 2:e593.
- 514 47. Wickham H. 2009. *ggplot2: Elegant Graphics for Data Analysis*. Springer-Verlag New  
515 York.
- 516 48. Lozupone C, Knight R. 2005. UniFrac: a new phylogenetic method for comparing  
517 microbial communities. *Appl Environ Microbiol* 71:8228–35.

- 518 49. Kind T, Wohlgemuth G, Lee DY, Lu Y, Palazoglu M, Shahbaz S, Fiehn O. 2009.  
519 FiehnLib: Mass Spectral and Retention Index Libraries for Metabolomics Based on  
520 Quadrupole and Time-of-Flight Gas Chromatography/Mass Spectrometry. *Anal Chem*  
521 81:10038–10048.
- 522 50. Kind T, Tsugawa H, Cajka T, Ma Y, Lai Z, Mehta SS, Wohlgemuth G, Barupal DK,  
523 Showalter MR, Arita M, Fiehn O. 2017. Identification of small molecules using accurate  
524 mass MS/MS search. *Mass Spectrom Rev.*
- 525 51. Cajka T, Fiehn O. 2016. Toward Merging Untargeted and Targeted Methods in Mass  
526 Spectrometry-Based Metabolomics and Lipidomics. *Anal Chem* 88:524–545.
- 527 52. Paradis E, Claude J, Strimmer K. 2004. A{PE}: analyses of phylogenetics and evolution  
528 in {R} language. *Bioinformatics* 20:289–290.
- 529 53. Oksanen J, Blanchet FG, Friendly M, Kindt R, Legendre P, McGlinn D, Minchin PR,  
530 O’Hara RB, Simpson GL, Solymos P, Stevens MHH, Szoecs E, Wagner H. 2016. *vegan*:  
531 *Community Ecology Package*.
- 532

533 **Table 1.** Clinical and sampling information for all infants.

| Infant | # samples | Age sample(s) collected (days) | Age at disease onset (days) | Group   | Fetal age at birth | Birth weight (g) | Antibiotics                                  | Delivery mode | Feeding type           | Twin set |
|--------|-----------|--------------------------------|-----------------------------|---------|--------------------|------------------|----------------------------------------------|---------------|------------------------|----------|
| 1      | 2         | 7,7                            |                             | control | 27w4d              | 875              |                                              | c-section     | breastmilk             |          |
| 2      | 3         | 15,15,36                       |                             | control | 31w                | 1570             | ampicillin,gentamycin                        | c-section     | breastmilk and formula |          |
| 3      | 1         | 19                             |                             | control | 26w                | 980              | ampicillin,gentamycin                        | c-section     | breastmilk             |          |
| 4      | 2         | 11,11                          |                             | control | 30w3d              | 1335             |                                              | vaginal       | breastmilk             |          |
| 5      | 2         | 18,18                          |                             | control | 24w5d              | 630              |                                              | c-section     | breastmilk             |          |
| 6      | 4         | 25,26,28,43                    |                             | control | 28w5d              | 860              | ampicillin,gentamycin                        | c-section     | breastmilk and formula |          |
| 7      | 3         | 10,21,24                       |                             | control | 25w2d              | 885              |                                              | c-section     | breastmilk and formula |          |
| 8      | 1         | 10                             |                             | control | 25w4d              | 940              | ampicillin,gentamycin                        | vaginal       | breastmilk             |          |
| 9      | 1         | 8                              |                             | control | 27w2d              | 1205             |                                              | vaginal       | breastmilk             |          |
| 11     | 2         | 29,29                          |                             | control | 27w4d              | 850              | ampicillin,gentamycin                        | vaginal       | breastmilk             |          |
| 12     | 1         | 22                             |                             | control | 26w2d              | 880              | ampicillin,gentamycin                        | c-section     | breastmilk and formula | 1        |
| 13     | 1         | 23                             |                             | control | 26w2d              | 925              | ampicillin,gentamycin                        | c-section     | breastmilk and formula | 1        |
| 14     | 1         | 8                              |                             | control | 31w4d              | 1190             | ampicillin,gentamycin                        | c-section     | breastmilk             |          |
| 15     | 3         | 18,40,40                       |                             | control | 28w1d              | 1270             | ampicillin,gentamycin                        | c-section     | breastmilk and formula | 2        |
| 16     | 1         | 19                             |                             | control | 28w1d              | 1355             | ampicillin,gentamycin                        | c-section     | breastmilk and formula | 2        |
| 17     | 3         | 18,32,54                       |                             | control | 26w2d              | 660              | ampicillin,cefotaxime                        | c-section     | breastmilk             |          |
| 21     | 1         | 10                             |                             | control | 28w6d              | 1180             | ampicillin,gentamycin                        | c-section     | breastmilk             |          |
| 22     | 1         | 25                             |                             | control | 28w6d              | 1360             | ampicillin,cefotaxime                        | vaginal       | breastmilk and formula |          |
| 24     | 2         | 27,73                          |                             | control | 26w                | 740              | ampicillin,gentamycin                        | c-section     | breastmilk             | 3        |
| 25     | 1         | 28                             |                             | control | 26w                | 780              | ampicillin,gentamycin                        | c-section     | breastmilk             | 3        |
| 35     | 2         | 18,18                          |                             | control | 25w5d              | 920              |                                              | c-section     | breastmilk and formula |          |
| 23     | 7         | 14,15,27,28,30,30,56           | 27                          | NEC     | 26w6d              | 1080             | ampicillin,gentamycin, cefotaxime,vancomycin | vaginal       | breastmilk             |          |
| 28     | 4         | 31,32,33,48                    | 31                          | NEC     | 26w                | 1060             | vancomycin,piperacillin                      | c-section     | breastmilk and formula |          |
| 30     | 4         | 21,41,42,56                    | 41                          | NEC     | 23w6d              | 620              | cefazolin,azithromycin,ampicillin            | vaginal       | breastmilk and formula |          |
| 20     | 1         | 21                             | 26                          | septic  | 24w5d              | 815              | ampicillin,gentamycin                        | c-section     | breastmilk             |          |
| 10     | 6         | 15,35,36,37,39,40              | 27                          | septic  | 26w5d              | 940              | ampicillin,gentamycin,vancomycin             | vaginal       | breastmilk and formula |          |
| 26     | 1         | 22                             | 22                          | septic  | 24w4d              | 660              | ampicillin,gentamycin,cefotaxime,vancomycin  | c-section     | breastmilk             | 4        |
| 27     | 2         | 22,31                          | 29                          | septic  | 24w5d              | 650              | ampicillin,gentamycin                        | c-section     | breastmilk             | 4        |
| 29     | 2         | 20,26                          | 26                          | septic  | 26w1d              | 980              | cefotaxime,vancomycin                        | c-section     | breastmilk             |          |
| 31     | 5         | 10,34,35,38,45                 | 34                          | septic  | 27w                | 710              | ampicillin,gentamycin                        | c-section     | breastmilk and formula |          |
| 32     | 4         | 32,32,53,75                    | 32                          | septic  | 27w5d              |                  |                                              |               | breastmilk and formula |          |
| 37     | 3         | 8,17,18                        | 13                          | septic  | 24w1d              | 680              | ampicillin,gentamycin,cefazolin,oxacillin    | vaginal       | breastmilk             |          |

534

535

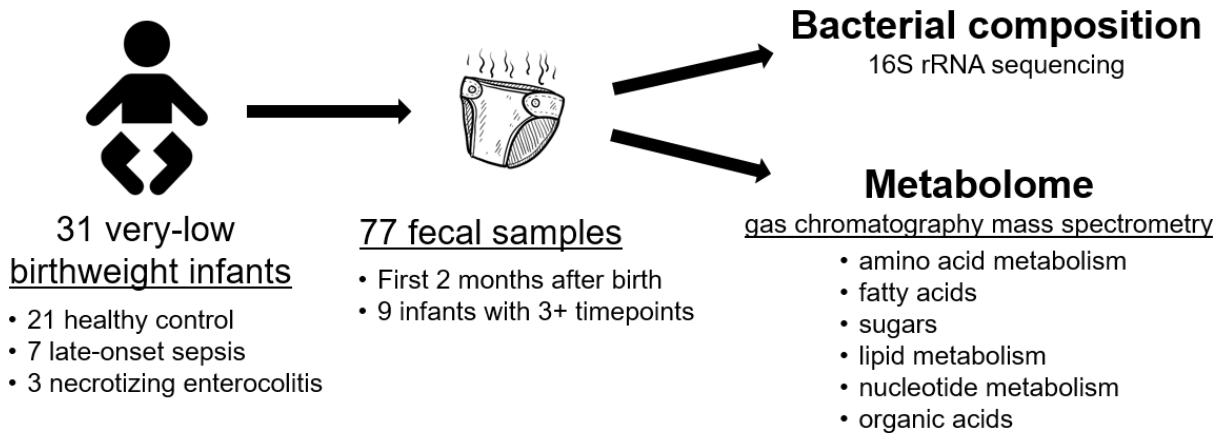

536

537

538 **Figure 1.** Study design schematic. Longitudinal fecal samples were collected over the first 75  
539 days of life from very low birthweight infants in the NICU. Bacterial compositions and  
540 metabolomes were characterized.



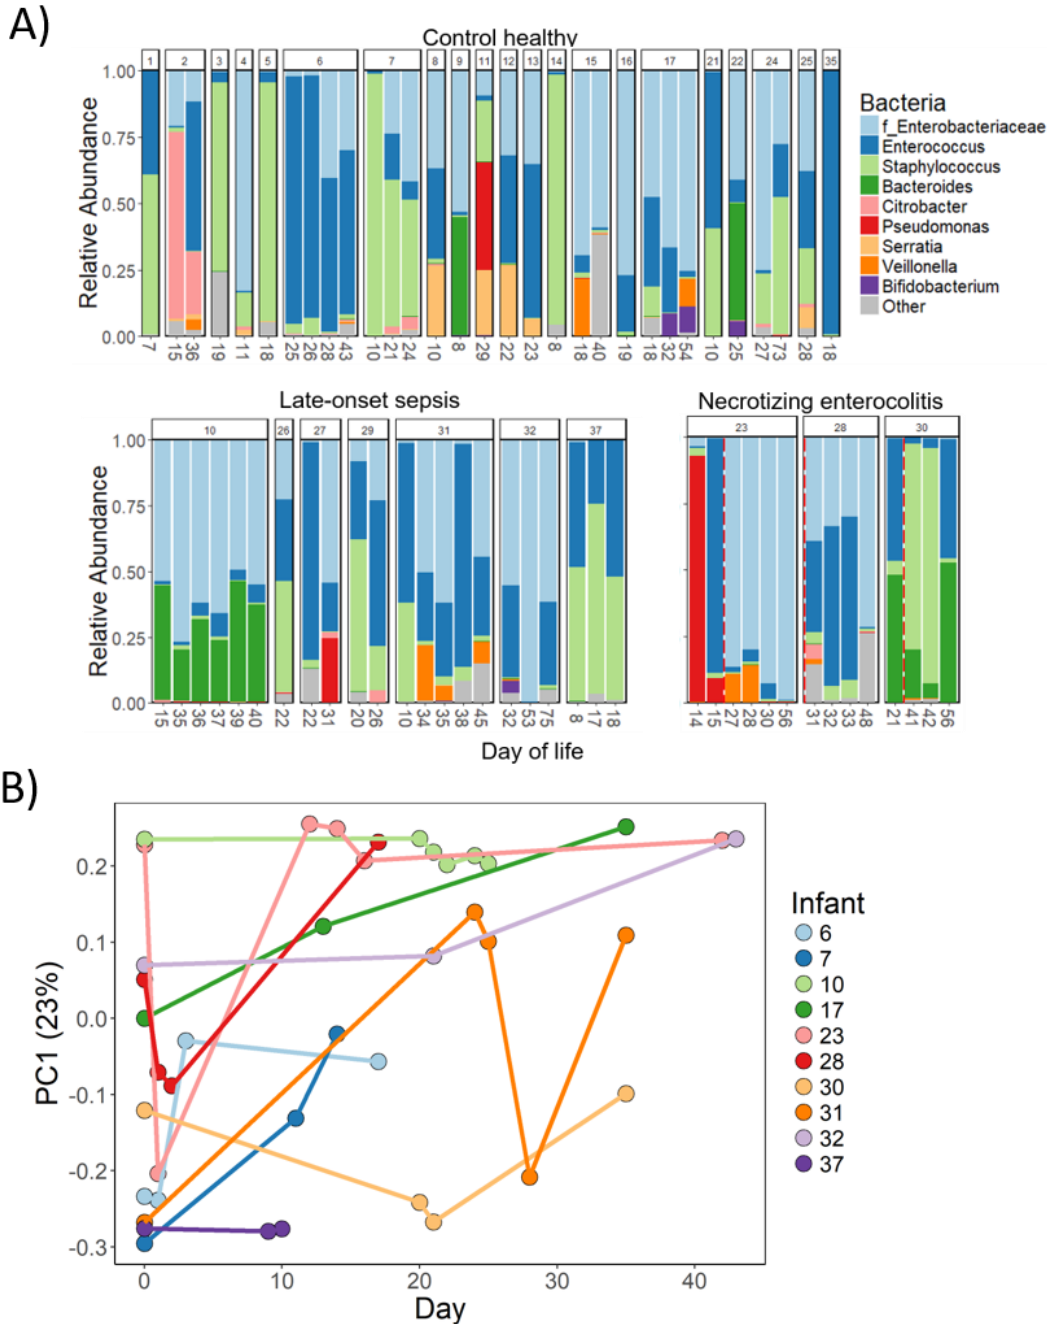

541

542 **Figure 2.** Bacterial composition of preterm infant guts. A) Stacked barplot of relative abundance of  
 543 bacterial genera in all infant samples. The family *Enterobacteriaceae* is included because genus level  
 544 resolution was not available. Infants are grouped together by health outcome. The timing of necrotizing  
 545 enterocolitis diagnosis is indicated by a vertical dotted line. B) First axis of PCoA based on weighted  
 546 UniFrac distances between bacterial communities plotted over time. Only infants with three or more  
 547 longitudinal samples shown in B.

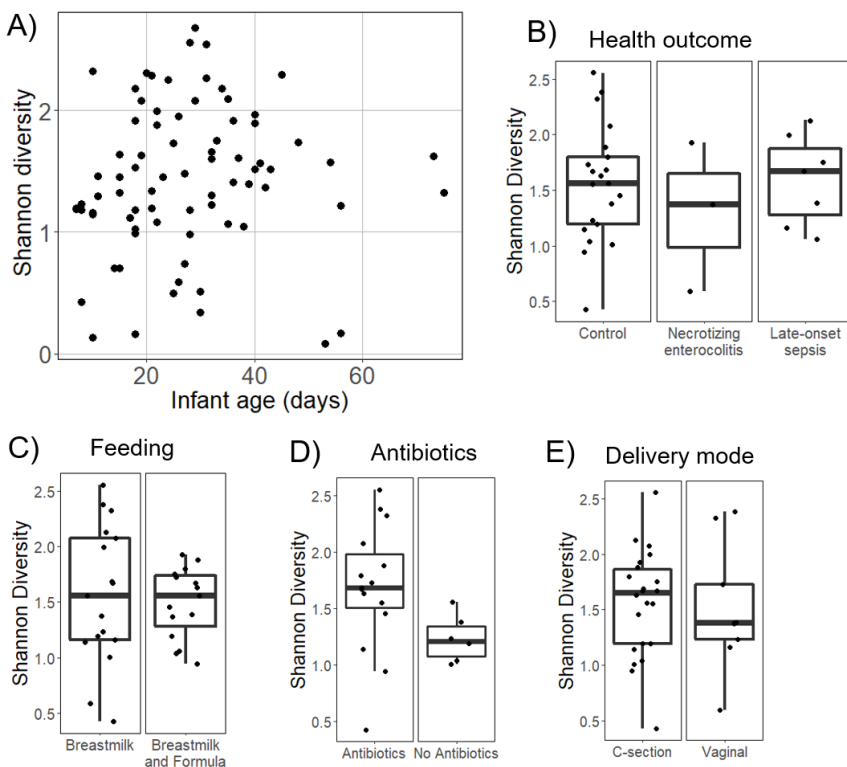

548

549 **Figure 3.** Alpha diversity measured by Shannon index of bacterial composition. A) Alpha diversity of all  
550 samples over the age of the infant. Boxplots of the average alpha diversity of each infant separated by B)  
551 health outcome, C) infants that were fed only breastmilk or a combination of formula and breastmilk, D)  
552 record of antibiotic usage, or E) delivery mode.

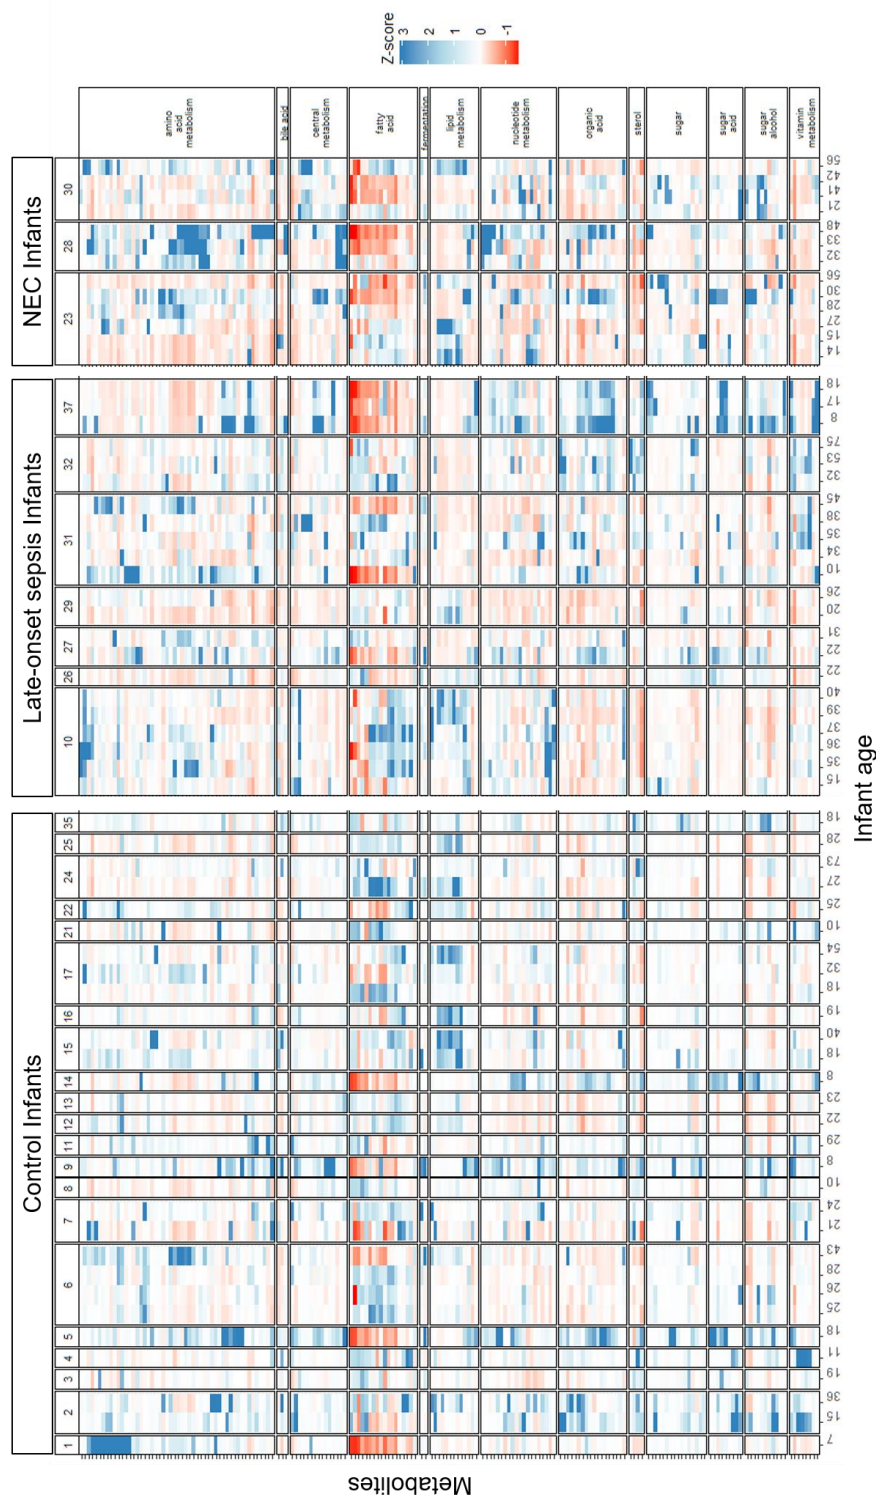

553

554 **Figure 4.** Metabolite profile of preterm infant fecal samples. Color is the modified z-score which is based  
 555 on the median intensity for each metabolite in all infant samples. Red cells indicate standard deviations  
 556 below the median and blue indicate standard deviations above the median value for each metabolite.  
 557 Measured metabolites that could be assigned to a category are shown. Samples on the x-axis and grouped  
 558 by infant and ordered longitudinally. Metabolites within each category are listed in the supplemental data.

559

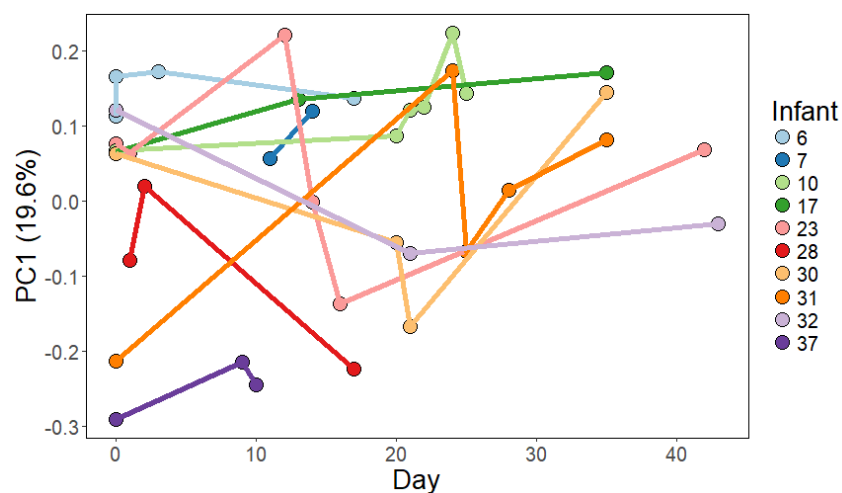

560

561 **Figure 5.** First component of PCoA of metabolite profile over time. Manhattan distances between  
562 samples were calculated and visualized by PCoA. The first principal component which explains the most  
563 variation among the samples is shown over time. Each dot represents a single fecal sample and is colored  
564 by infant. Lines connect samples for each infant to show change over time. Only infants with three or  
565 more longitudinal samples shown.

566

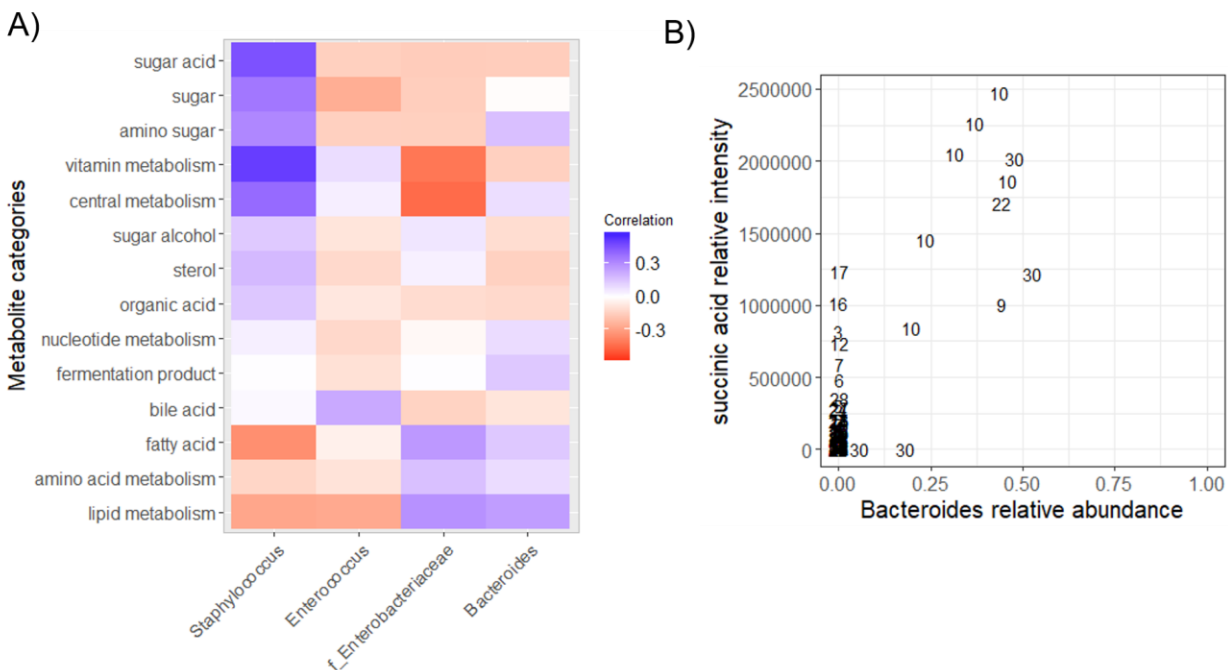

567  
568 **Figure 6.** Correlations between bacteria abundances and metabolite intensities. A) Average of  
569 correlations between bacterial abundances and all metabolites in each metabolite category. B) Correlation  
570 between *Bacteroides* abundance and succinic acid intensity in all samples. Numbers indicate infant  
571 number.
